# Supplementary material for: An oncolytic virus expressing a full-length antibody enhances antitumor innate immune response to glioblastoma
Source: PubMed Central journal article supplement (PMC8501058; doi:10.1038/s41467-021-26003-6), 2021-10-08
Supplement: 41467_2021_26003_MOESM1_ESM.pdf [file 41467_2021_26003_MOESM1_ESM.pdf]

## Supplementary Information

### **An oncolytic virus expressing a full-length antibody enhances antitumor innate immune response to glioblastoma**

Bo Xu<sup>#1</sup>, Lei Tian<sup>#1</sup>, Jing Chen<sup>#2</sup>, Jing Wang<sup>1</sup>, Rui Ma<sup>1</sup>, Wenjuan Dong<sup>1</sup>,  
Aimin Li<sup>3</sup>, Jianying Zhang<sup>4</sup>, E. Antonio Chiocca<sup>5</sup>, Balveen Kaur<sup>6</sup>,  
Mingye Feng<sup>2</sup>, Michael A. Caligiuri<sup>1,7,8\*</sup>, and Jianhua Yu<sup>1,2,7,8\*</sup>

<sup>1</sup>Department of Hematology and Hematopoietic Cell Transplantation, City of Hope National Medical Center, Los Angeles, California, USA.

<sup>2</sup>Department of Immuno-Oncology, Beckman Research Institute, City of Hope Comprehensive Cancer Centre, Los Angeles, California, USA.

<sup>3</sup>Pathology Core of Shared Resources Core, Beckman Research Institute, City of Hope National Medical Center, Los Angeles, California, USA.

<sup>4</sup>Department of Computational and Quantitative Medicine, City of Hope National Medical Center, Los Angeles, California, USA.

<sup>5</sup>Department of Neurosurgery, Brigham and Women's Hospital and Harvey Cushing Neuro-oncology Laboratories, Harvard Medical School, Boston, Massachusetts, USA

<sup>6</sup>The Vivian L. Smith Department of Neurosurgery, Mc Govern Medical School, University of Texas, University of Texas Health Science Center at Houston, Houston, Texas, USA.

<sup>7</sup>Comprehensive Cancer Center, City of Hope, Los Angeles, California, USA.

<sup>8</sup>Hematologic Malignancies Research Institute, City of Hope National Medical Center, Los Angeles, California, USA.

# These authors equally contributed to this work.

\*Corresponding authors: Michael A. Caligiuri, MD, [mcaligiuri@coh.org](mailto:mcaligiuri@coh.org); Jianhua Yu, PhD, [jjayu@coh.org](mailto:jjayu@coh.org)

Supplementary Figure 1

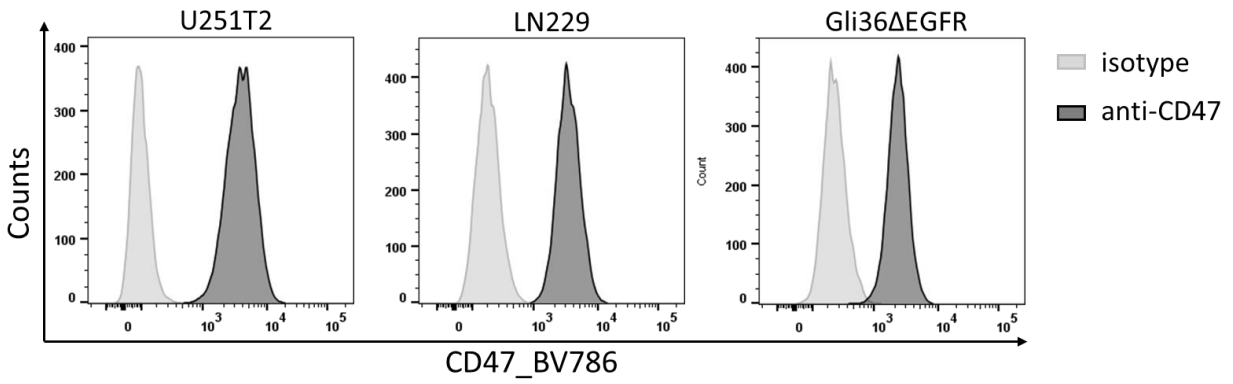

**Supplementary Figure 1. CD47 expression on human GBM cells.** CD47 expression on human GBM cell lines, U251T2, Gli36 $\Delta$ EGFR, and LN229, were assessed by flow cytometry using a BV786-conjugated anti-CD47 antibody.

## Supplementary Figure 2

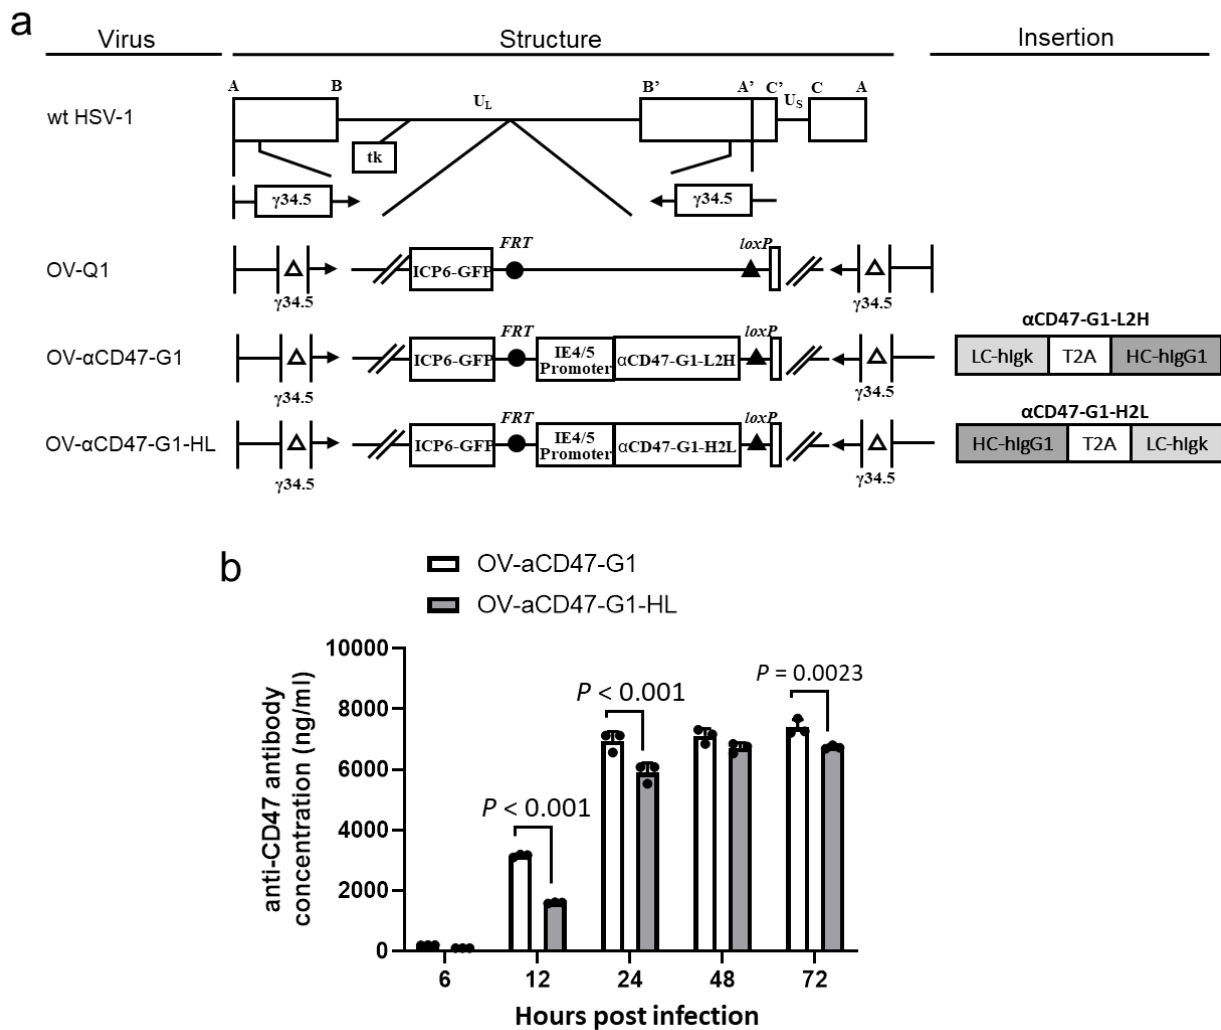

**Supplementary Figure 2. Construction and characterization of OV-Q1, OV- $\alpha$ CD47-G1, and OV- $\alpha$ CD47-G1-HL.** (a) Schematic of oncolytic viruses used in this study. Top: genetic map of wild type HSV-1. Second: genetic map of control oHSV, OV-Q1, with deletion of two copies of  $\gamma$ 34.5, dysfunction of ICP6, and insertion of the GFP gene. Third: genetic map of OV- $\alpha$ CD47-G1 showing the inserted coding gene of IgG1 version of anti-CD47 ( $\alpha$ CD47-G1) that is constructed on a human IgG1 scaffold. The light chain and heavy chain coding genes of  $\alpha$ CD47-G1 linked by a T2A sequence are driven by the viral pIE4/5 promoter. Fourth: The genetic map of OV- $\alpha$ CD47-G1-HL showing the switched positions of light chain and heavy chain coding genes compared to OV- $\alpha$ CD47-G1. (b)  $\alpha$ CD47-G1 yields of OV- $\alpha$ CD47-G1- and OV- $\alpha$ CD47-G1-HL-infected U251T2 cells were tested by flow cytometry assay. Differences in detection were assayed at the indicated time points. Data are representative of three independent experiments with similar data. Data are presented as mean values  $\pm$  SD ( $n = 3$ ). Statistical analyses were performed by two-side Student's t test.

### Supplementary Figure 3

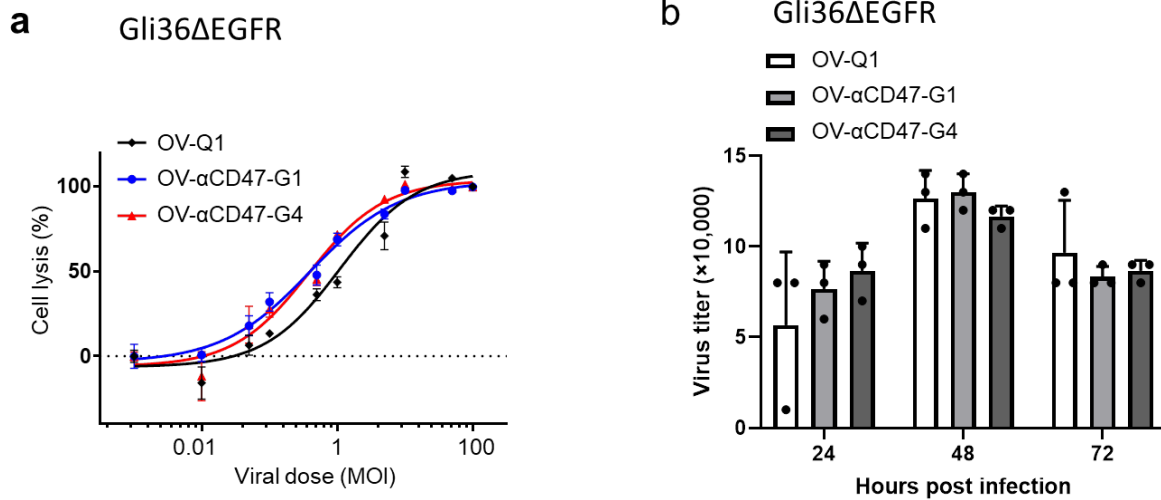

**Supplementary Figure 3. Viral production and infectivity of OV- $\alpha$ CD47-G1 and OV- $\alpha$ CD47-G4.** (a) Gli36 $\Delta$ EGFR human GBM cells were infected with OV-Q1, OV- $\alpha$ CD47-G1, or OV- $\alpha$ CD47-G4 at the indicated MOIs. Cell lysis was analyzed 3 days after infection by CCK8 assay. Data are presented as mean values  $\pm$  SD ( $n = 3$ ). (b) Gli36 $\Delta$ EGFR human GBM cells were infected with OV-Q1, OV- $\alpha$ CD47-G1, or OV- $\alpha$ CD47-G4 at an MOI of 2. The supernatants were harvested at indicated time points and checked for viral reproduction using a plaque assay in Vero cells. Data are representative of three independent experiments with similar data. Data are presented as mean values  $\pm$  SD ( $n = 3$ ). No statistical differences were noted.

## Supplementary Figure 4

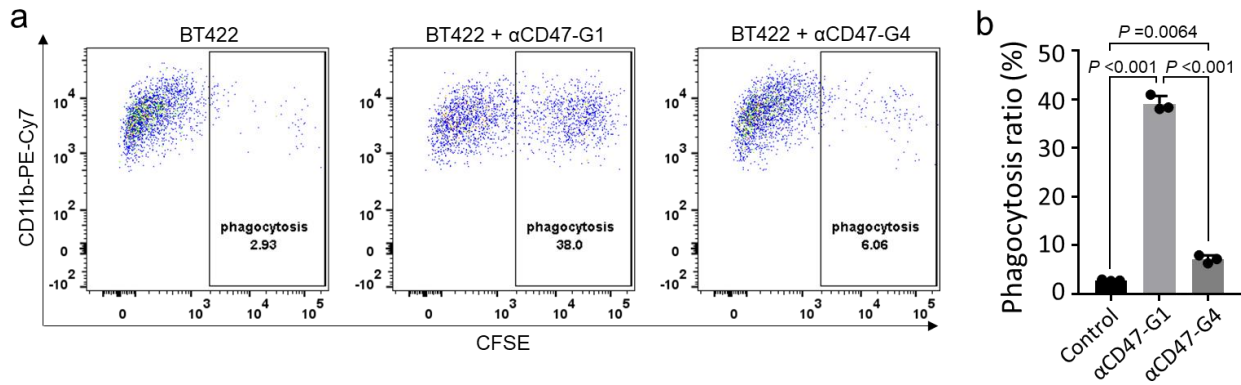

**Supplementary Figure 4.  $\alpha$ CD47-G1 and  $\alpha$ CD47-G4 induce phagocytosis of GBM cells by mouse BMDMs.** The effect of  $\alpha$ CD47-G1 and  $\alpha$ CD47-G4 purified from CHO cells on phagocytosis of GBM cells by mouse bone marrow derived-macrophages (BMDMs). (a & b) BT422 human GBM cells were labeled with CFSE and co-cultured with mouse BMDMs at an effector:target ratio of 1:2 in the presence of vehicle control,  $\alpha$ CD47-G1 or  $\alpha$ CD47-G4 at a concentration of 5  $\mu$ g/ml. Phagocytosis was quantified by the percentage of BMDM uptake of labeled tumor cells (CD11b+CFSE+). Data presented in (a) are representative results and in (b) are summarized results. One-way ANOVA with P values corrected for multiple comparisons by the Bonferroni test ( $n = 3$  technical replicates). All experiments were performed with three mice per group. Data are presented as mean values  $\pm$  SD ( $n = 3$ ).

## Supplementary Figure 5

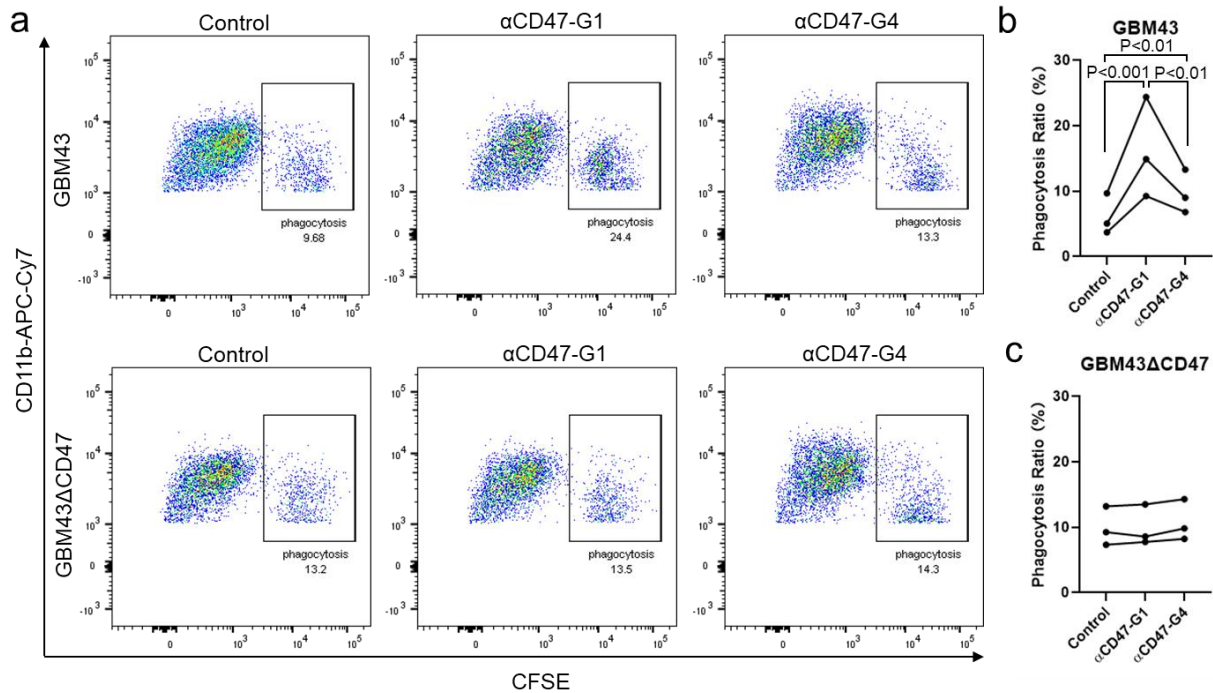

**Supplementary Figure 5. Macrophage phagocytosis with GBM43 $\Delta$ CD47 and GBM43 as target cells.** (a-c) The effect of  $\alpha$ CD47-G1 and  $\alpha$ CD47-G4 purified from CHO cells on phagocytosis of GBM43 and GBM43 $\Delta$ CD47 cells by human macrophages. GBM43 and GBM43 $\Delta$ CD47 cells were labeled with CFSE and co-cultured with human macrophages at an effector:target ratio of 1:2 in the presence of vehicle control,  $\alpha$ CD47-G1 or  $\alpha$ CD47-G4 at a concentration of 5  $\mu$ g/ml. Phagocytosis was quantified by the percentage of human macrophage uptake of labeled tumor cells (CD11b+CFSE+). Data presented in (a) are representative results and in (b and c) are summarized results. One-way ANOVA with P values corrected for multiple comparisons by the Bonferroni method after data log transformation (n = 3 donors).

Supplementary Figure 6

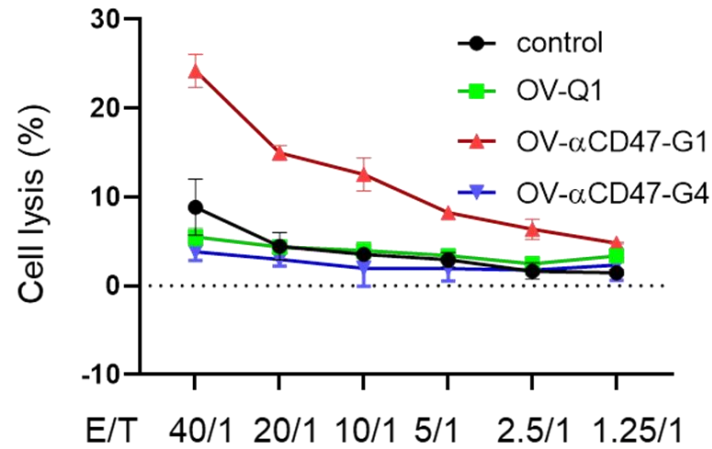

**Supplementary Figure 6.  $\alpha$ CD47-G1 but not  $\alpha$ CD47-G4 induces cytotoxicity of human NK cells against GBM cells at various effector: target ratios.** Cytotoxicity of human primary NK cells against GBM43 cells in control media or conditioned media from the culture of OV-Q1-, OV- $\alpha$ CD47-G1- or OV- $\alpha$ CD47-G4-infected U251T2 GBM cells at various effector (E): target (T) ratios between 40:1 and 1.25:1 in a  $^{51}\text{Cr}$  release assay.  $P < 0.001$ , OV- $\alpha$ CD47-G1 vs. control at an E:T ratio of 2.5. One-way ANOVA with P values corrected for multiple comparisons by the Bonferroni test. Error bars represent standard deviations of means of three donors.

Supplemental Figure 7

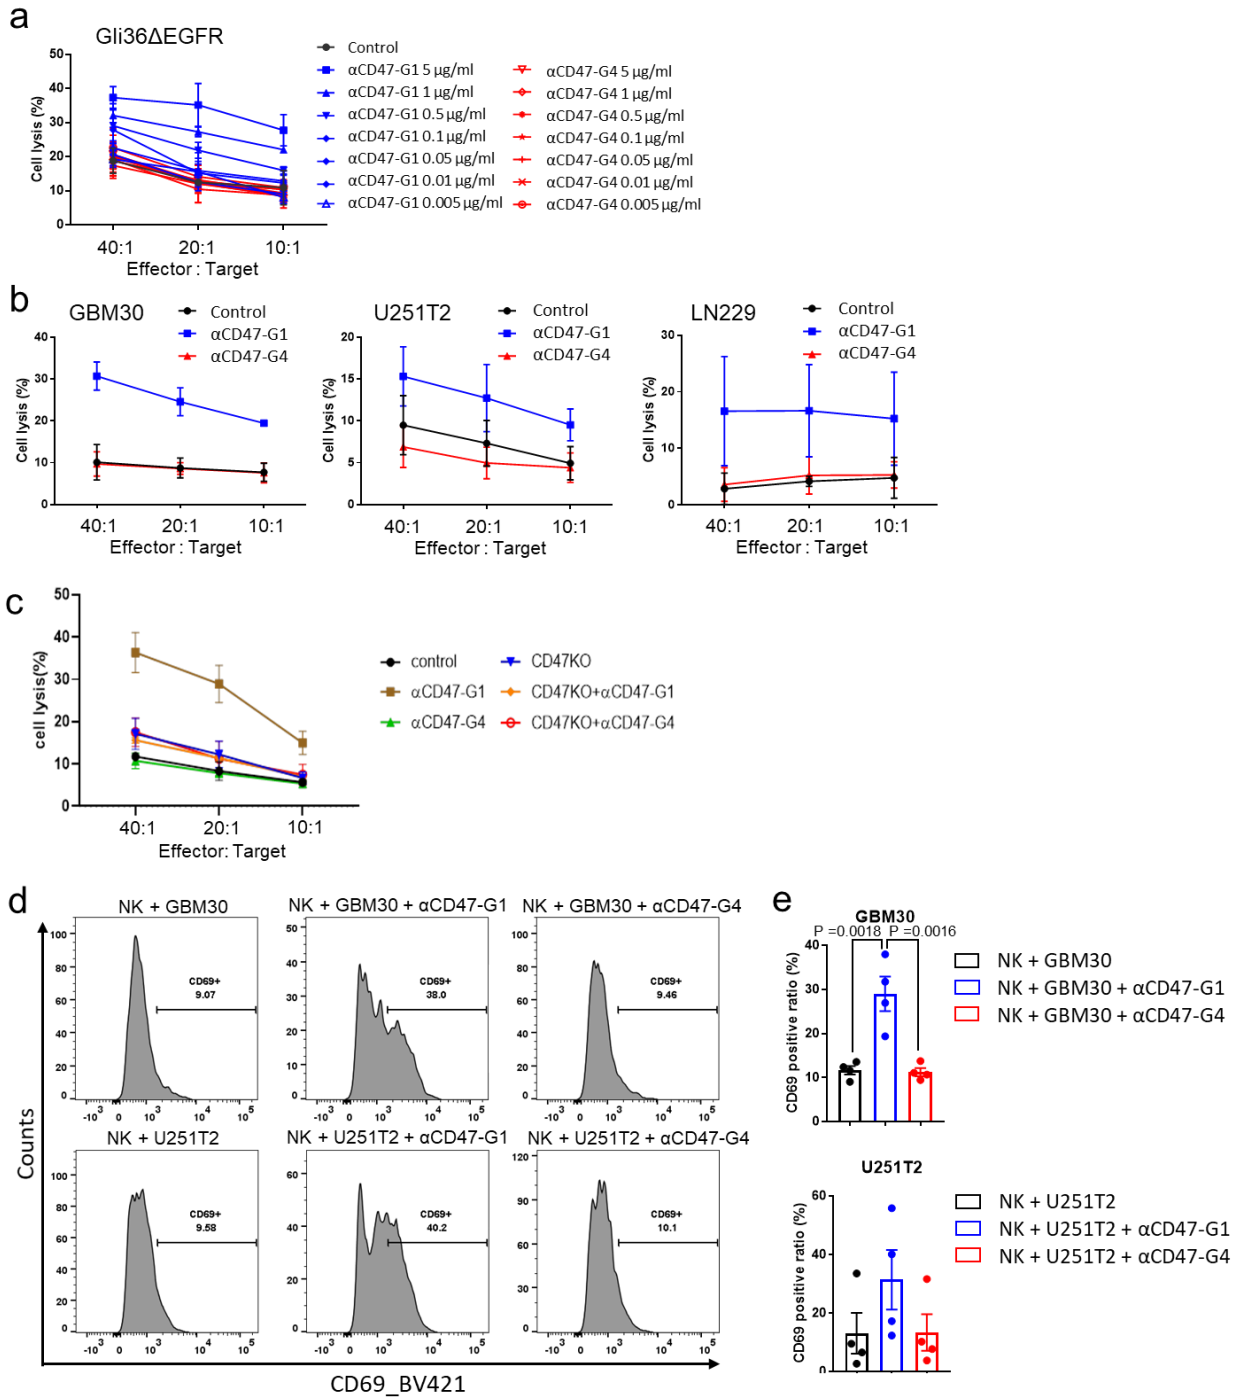

**Supplementary Figure 7.  $\alpha$ CD47-G1 but not  $\alpha$ CD47-G4 induces cytotoxicity of human NK cells against GBM cells.** (a) Cytotoxicity of human primary NK cells against Gli36ΔEGFR human GBM cells pretreated with different doses of  $\alpha$ CD47-G1 or  $\alpha$ CD47-G4 for 20 min. NK cells were added to the pre-treated GBM cells without washing at the effector: target ratios of 40:1, 20:1, and 10:1 in a  $^{51}\text{Cr}$  release assay. (b) Cytotoxicity of primary human NK cells against



$\alpha$ CD47-G1- and  $\alpha$ CD47-G4-pretreated three human GBM lines: GBM30, U251T2, and LN229. A linear mixed model was used to account for the underlying variance and covariance structure (n = 4 donors). (c) NK cell killing assay with GBM43 $\Delta$ CD47 and GBM43 as target cells. For GBM43 cells as target cells,  $\alpha$ CD47-G1 vs. control,  $P < 0.001$ .  $\alpha$ CD47-G4 vs. control, no significance. For GBM43  $\Delta$ CD47 as target cells,  $\alpha$ CD47-G1 vs. control, no significance.  $\alpha$ CD47-G4 vs. control, no significance. A linear mixed model was used to account for the underlying variance and covariance structure. The experiments were performed with three donors in triplicate. Error bars represent standard deviations of means of three donors. A linear mixed model was used to account for the underlying variance and covariance structure (n = 4 donors) (d)  $\alpha$ CD47-G1 but not  $\alpha$ CD47-G4 induced the expression of the NK cell activation marker CD69. GBM30 or U251T2 human GBM cells that were pretreated with  $\alpha$ CD47-G1 or  $\alpha$ CD47-G4 at the concentration of 1  $\mu$ g/ml and then co-cultured with primary human NK cells at a ratio of 1:1 for 4 hours. No cell wash was applied before NK cells were added. CD69 expression on NK cells was measured by flow cytometry to quantify the level of NK cell activation. (e) Statistic summary of (d). One-way ANOVA with Bonferroni's multiple comparisons test (n = 4 donors). The experiments were performed with four donors in triplicate. Error bars represent standard deviations of means of four donors.

## Supplementary Figure 8

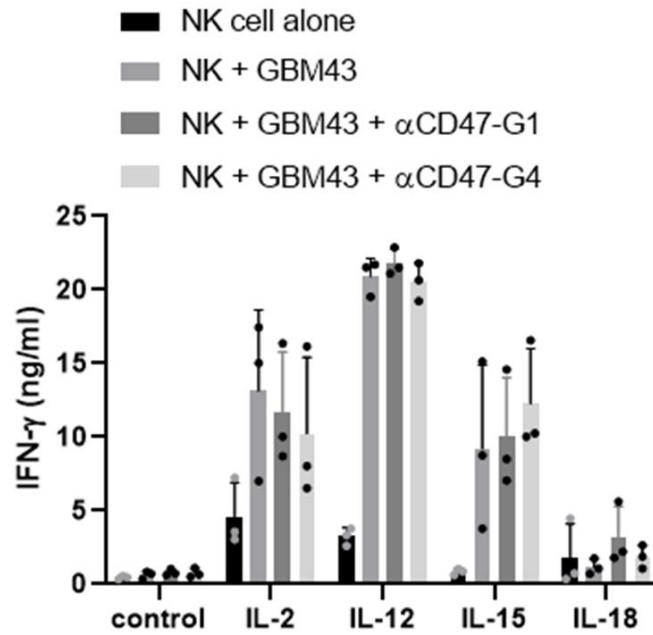

**Supplementary Figure 8. IFN- $\gamma$  ELISA assay.** Primary human NK cells were co-cultured with GBM43 cells with  $\alpha$ CD47-G1 or  $\alpha$ CD47-G4 in the presence of IL-2, IL-12, IL-15, IL-18, or PBS vehicle control. The experiments were performed with three donors in triplicate. Error bars represent standard deviations of means of three donors.

Supplementary Figure 9

a

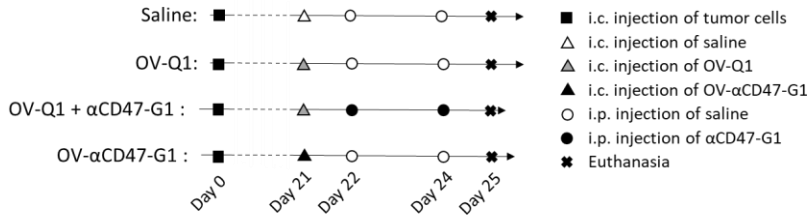

b

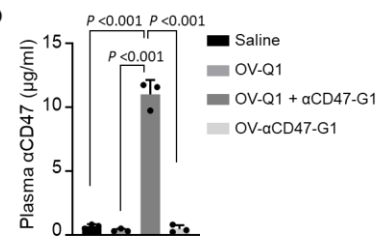

c

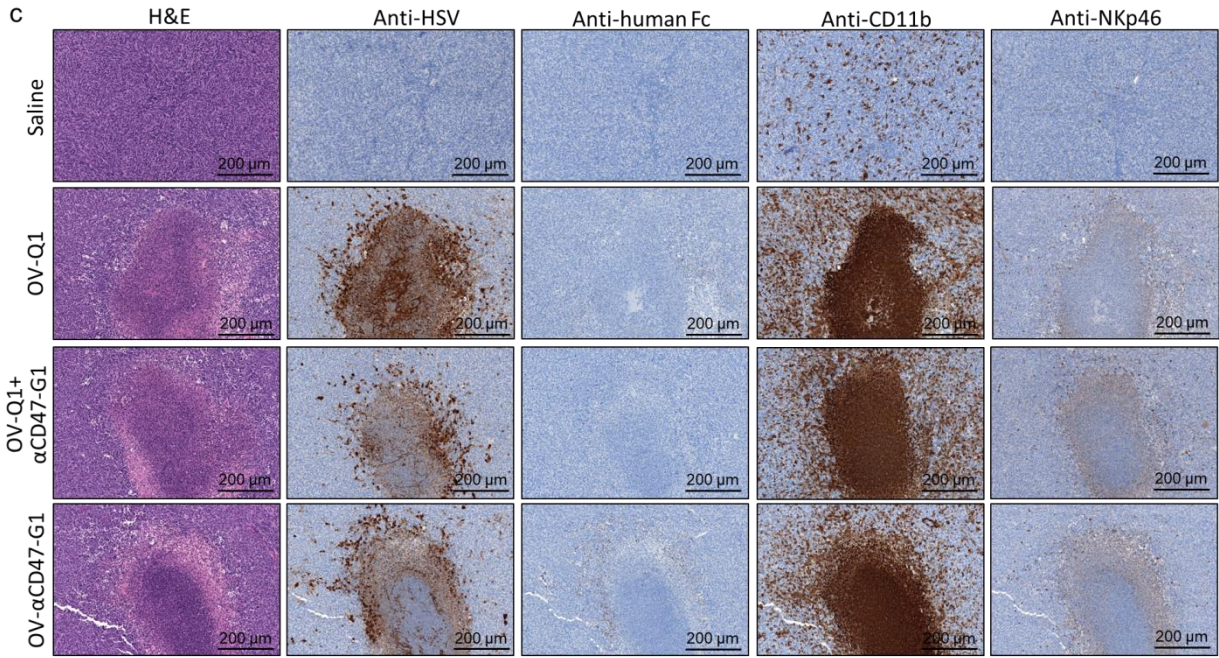

d

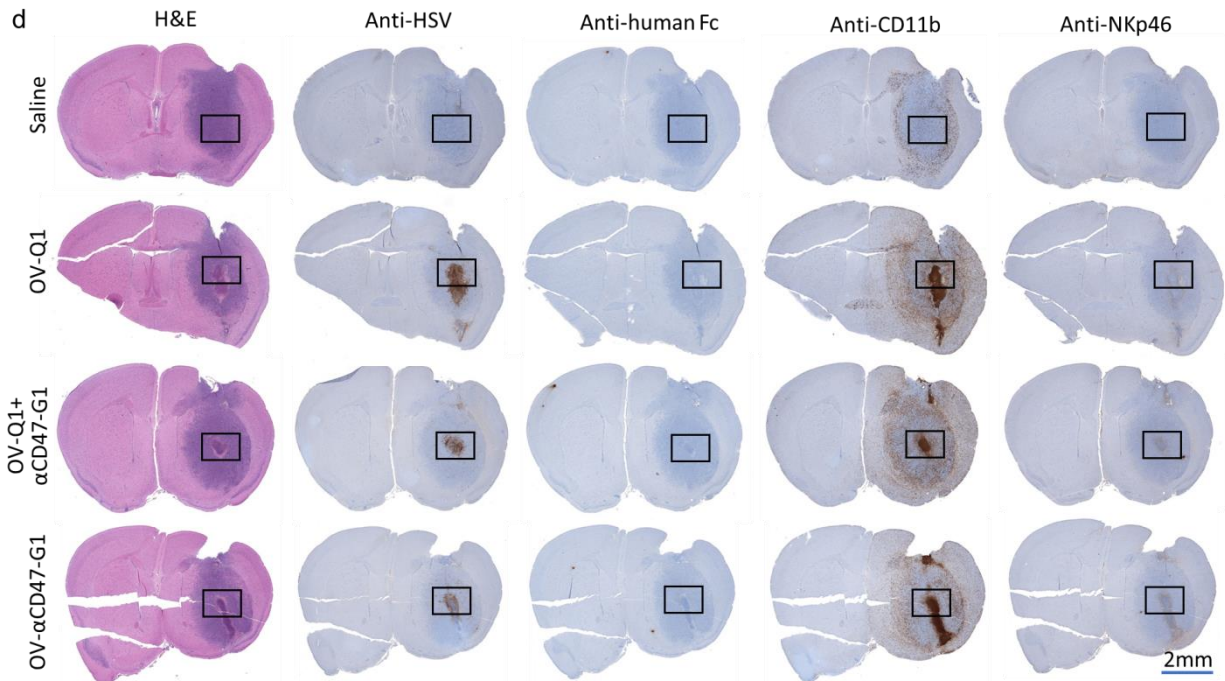

**Supplementary Figure 9. OV- $\alpha$ CD47-G1 infection continuously delivers anti-CD47 antibody to the tumor microenvironment, while systemic infusion of  $\alpha$ CD47-G1 does not.** (a) Experimental timeline for *in vivo* studies using an orthotopic model of human GBM. Details of the experiment are provided in the Method section. There were four treatment groups: Group 1, saline; Group 2, OV-Q1; Group 3, a combination of OV-Q1 plus i.p. administration of  $\alpha$ CD47-G1; and Group 4, OV- $\alpha$ CD47-G1. On day 0, mice were implanted with  $1 \times 10^5$  GBM43 cells i.c.. After tumor implantation, Groups 2, 3, and 4 received intratumoral injection of oHSV (OV-Q1 or OV- $\alpha$ CD47-G1) at a dose of  $2 \times 10^5$  PFU per mouse on day 21. Group 1 received saline as control. On days 22 and 24, Group 3 received i.p. injection of purified  $\alpha$ CD47-G1 at the dose of 150  $\mu$ g per mouse per day. Groups 1, 2, and 4 received i.p. injections of saline as control. All mice were euthanized on day 25 for blood and brain harvesting. (b) The concentration of  $\alpha$ CD47-G1 in plasma was measured by ELISA in mice from different treatments. One-way ANOVA with P values corrected for multiple comparisons by Bonferroni method multiple comparisons test ( $n = 3$  mice). (c & d) Slides from the brains isolated from experimental mice were subjected to H&E staining and immunohistochemical staining (IHC). IHC was performed with anti-HSV, anti-human Fc, which identifies  $\alpha$ CD47-G1, anti-CD11b, or anti-NKp46 antibodies. High and low magnifications of brain H&E and IHC with anti-HSV, anti-human Fc, anti-CD11b, and anti-Nkp46 staining at the tumor implantation site are shown in (c) and (d), respectively. The images with high magnification in (c) are exactly are representative of the boxed area in (d). Data presented are represented of one (c & d) or three (b) mice of at least three mice in total with similar data. Error bars (b) represent standard deviations of means of three mice.

Supplementary Figure 10

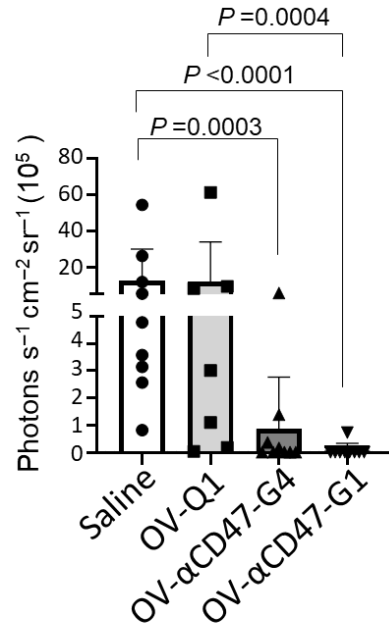

**Supplementary Figure 10. Quantification of the luciferase expression in the GBM43-FFL mouse model.** The luciferase intensity of the experimental mice shown in the main Figure 5b was measured 35 days post tumor implantation. Data are presented as mean values +/- SD. One-way ANOVA with P values corrected for multiple comparisons by the Bonferroni test. (n = 7 for OV-Q1 and 9 for other groups).

## Supplementary Figure 11

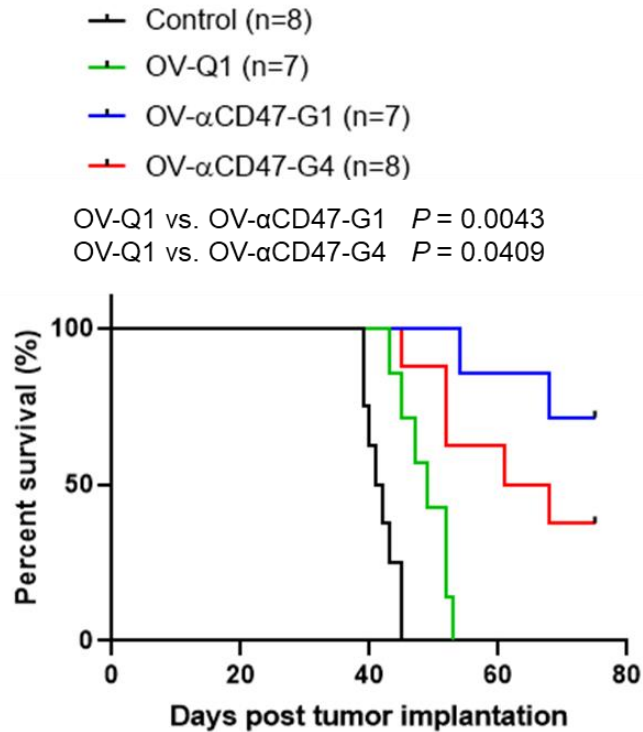

**Supplementary Figure 11. The therapeutic effects of OV- $\alpha$ CD47-G1 and OV- $\alpha$ CD47-G4 on treating mice with xenograft GBM.** The xenograft GBM model was established by intracranial (i.c.) injection of  $1 \times 10^5$  GBM43 cells. Seven days after tumor implantation, mice were received an i.c. injection with OV- $\alpha$ CD47-G1, OV- $\alpha$ CD47-G4 or OV-Q1 at the dose of  $2 \times 10^5$  PFU per mouse, or saline as a placebo control. Survival was estimated by the Kaplan–Meier method and compared by two-side log-rank test ( $n = 7$  or 8 animals).

## Supplementary Figure 12

- Control (n=8)
- OV-Q1 day14 (n=7)
- OV- $\alpha$ CD47-G1 day14 (n=7)
- - OV-Q1 day21 (n=7)
- - OV- $\alpha$ CD47-G1 day21 (n=7)

OV-Q1 day14 vs. OV- $\alpha$ CD47-G1 day14.  $P = 0.0321$   
Control vs. OV- $\alpha$ CD47-G1 day14.  $P < 0.001$

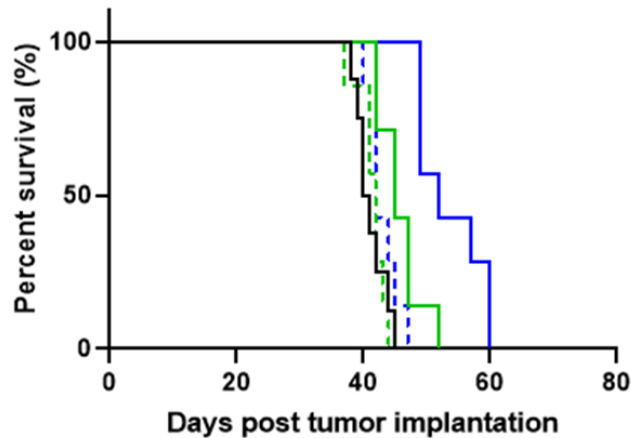

**Supplementary Figure 12. The therapeutic effect of OV- $\alpha$ CD47-G1 on treating an established GBM model with big tumors.** The xenograft GBM model was established by i.c. injection of  $1 \times 10^5$  GBM43 cells. Fourteen or twenty-one days after tumor implantation, mice were received an i.c. injection with OV- $\alpha$ CD47-G1 or OV-Q1 at the dose of  $2 \times 10^5$  PFU per mouse, or saline as a placebo control. Survival was estimated by the Kaplan–Meier method and compared by two-side log-rank test ( $n = 7$  or  $8$  animals per group).

## Supplementary Figure 13

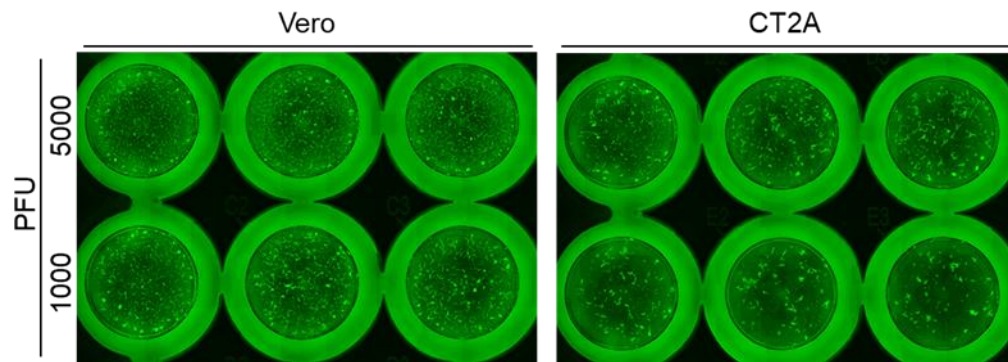

**Supplementary Figure 13. Susceptibility of CT2A cells to OV-Q1 infection.** Vero cells were used as positive control for comparison of susceptibility of CT2A to OV-Q1.



## Supplementary Figure 14

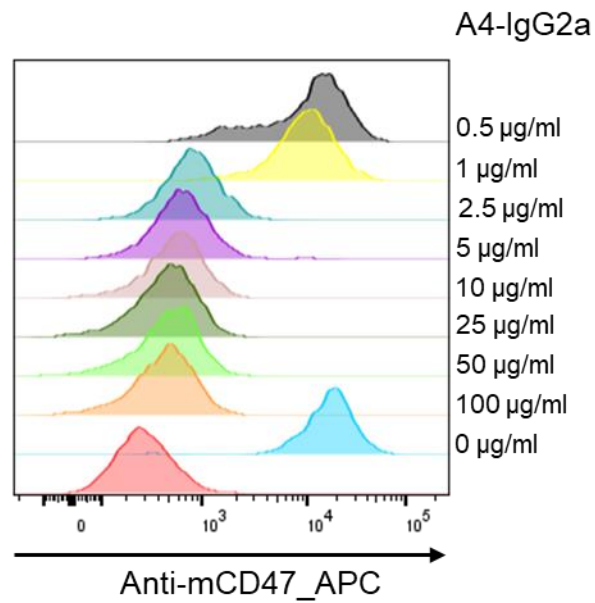

**Supplementary Figure 14. The blocking effect of A4-IgG2b.** CT2A cells were incubated with an increasing concentration of unlabeled A4-IgG2b mAb, followed by incubation with an APC-conjugated anti-mouse CD47 antibody. The blocking effect was assessed by flow cytometry.

## Supplementary Figure 15

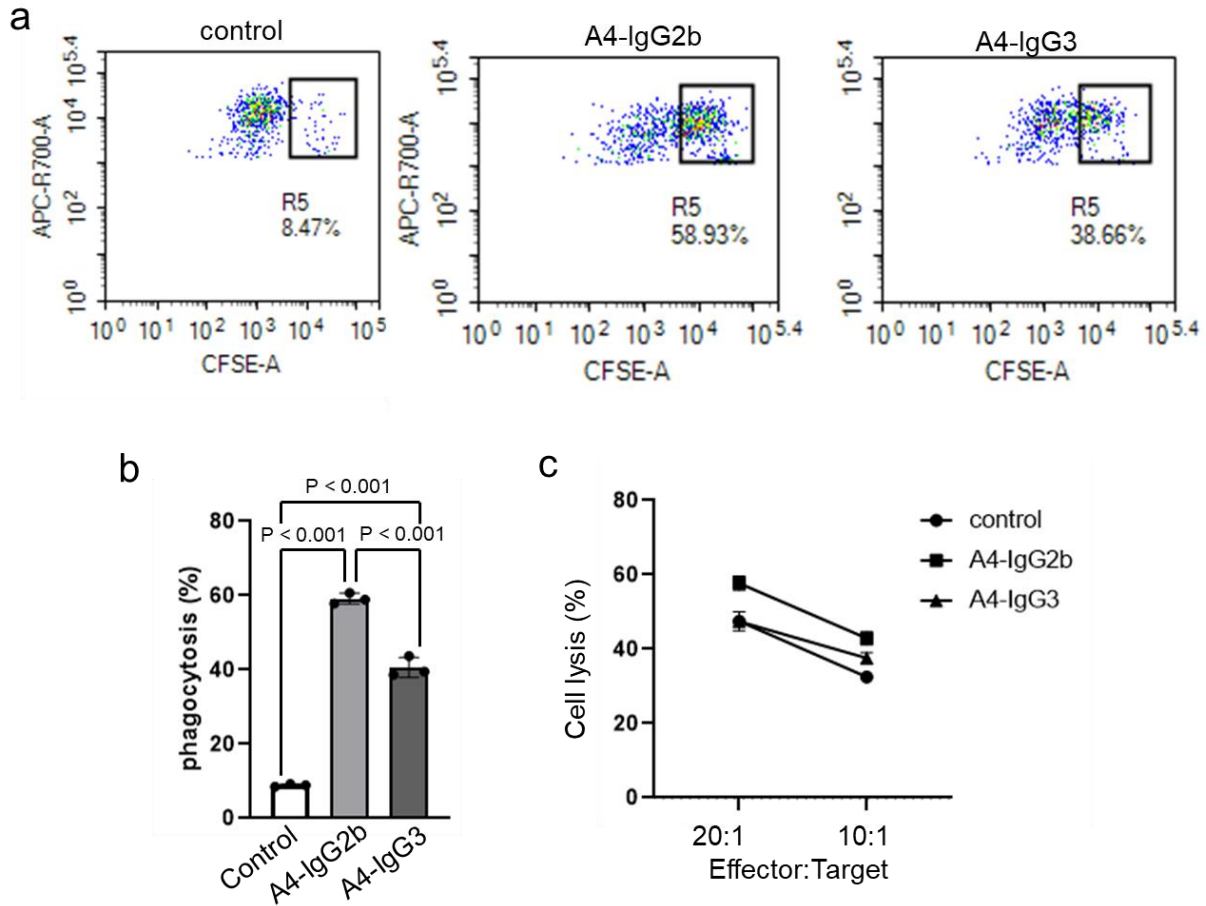

**Supplementary Figure 15. The effect of A4-IgG2b and A4-IgG3 on macrophage and NK cell activation.** (a & b) CT2A cells were labeled with CFSE and co-cultured with mouse BMDMs at an effector:target ratio of 1:2 in the presence of PBS vehicle control, A4-IgG2b, or A4-IgG3 at a concentration of 5  $\mu\text{g/ml}$ . Phagocytosis was quantified by the percentage of BMDM uptake of labeled tumor cells (CD11b+CFSE+). Data in (a) are representative results and in (b) are summarized results. One-way ANOVA with P values corrected for multiple comparisons by the Bonferroni test. Data are presented as mean values  $\pm$  SD (n = 3). All experiments were performed with three mice per group. Error bars represent standard deviations of three mice. (c) Cytotoxicity of mouse NK cells against CT2A cells pre-treated with A4-IgG2b or A4-IgG3 for 20 min. NK cells were added to the pre-treated GBM cells without washing at the effector: target ratios of 20:1 and 10:1 in a  $^{51}\text{Cr}$  release assay. A4-IgG2b vs. control,  $P < 0.01$ ; A4-IgG3 vs. control, no significance. A linear mixed model was used to account for the underlying variance and covariance structure.

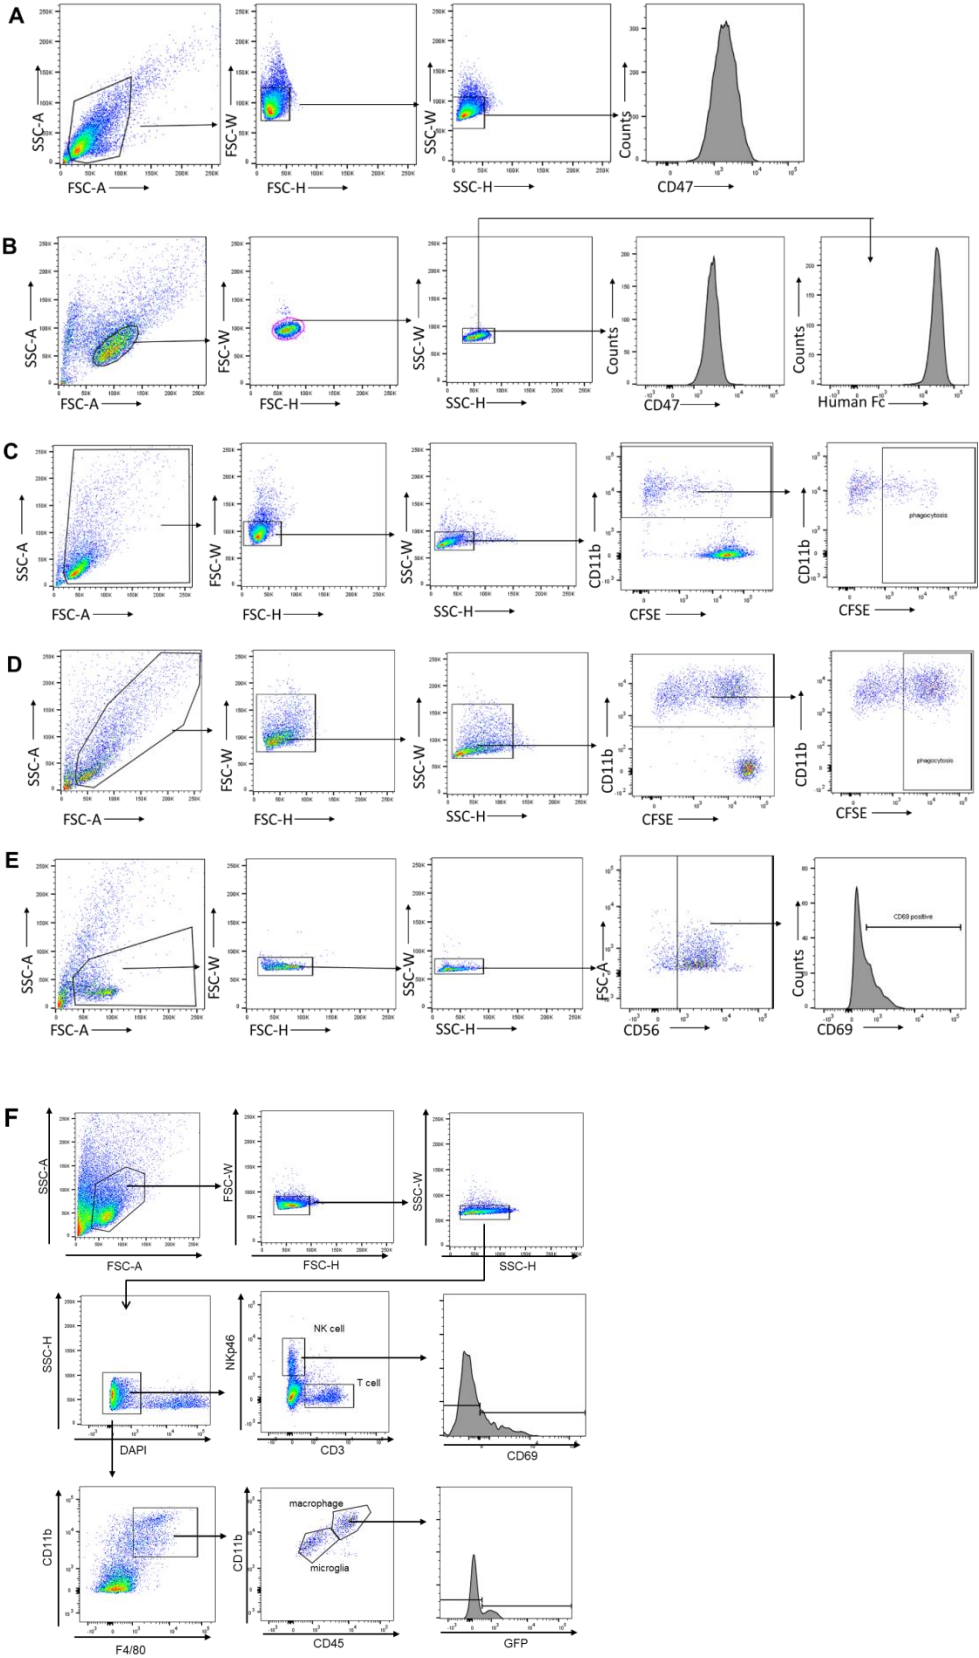

**Supplementary Figure 16. Flow cytometry gating strategy.** (a) To determine CD47 expression in GBM cells, live cells were further gated on FSC-A/SSC-A, FSC-H/FSC-W, and then SSC-H/SSC-W events to check surface expression levels of CD47 (for Fig. 1a and Supplementary Fig. 1). (b) For CD47 binding and blocking assays, live cells were further gated on FSC-A/SSC-A, FSC-H/FSC-W, and then SSC-H/SSC-W events to check surface expression levels of CD47 and human Fc (for Fig. 1b and c). (c & d) For the phagocytosis assay of macrophages, live cells were further gated on FSC-A/SSC-A, FSC-H/FSC-W, and then SSC-H/SSC-W events. Macrophages were defined as CD11b(+). Phagocytosis was measured as the percentage of CD11b(+) CFSE(+) macrophages (for Fig. 2a, c, g and i). (e) To determine CD69 expression in primary human NK cells, live cells were further gated on FSC-A/SSC-A, FSC-H/FSC-W, and then SSC-H/SSC-W events. NK cells were defined as CD56(+) events to check surface expression levels of CD69 (for Fig. 3d and Supplementary Fig. 5c). (f) For flow cytometric assays on murine immune cells, live cells were gated on FSC-A/SSC-A, FSC-H/FSC-W, SSC-H/SSC-W, and then SSC-H/DAPI. NK cells were defined as NKp46(+)CD3(-) (for Fig. 7d, g and h); Macrophages were defined as CD45<sup>high</sup>CD11b(+)F4/80(+) (for Fig. 7e, i and j); T cells were defined as NKp46(-)CD3(+) (for Fig. 7f).

## Supplementary Tables

**Supplementary Table 1. Antibodies used in this study**

| Item                                                                    | Catalogue   | Vendor                 | Dilution ratio |
|-------------------------------------------------------------------------|-------------|------------------------|----------------|
| BV786 Mouse Anti-Human CD47                                             | 563758      | BD biosciences         | 5 µl/test      |
| BV421 Mouse Anti-Human CD69                                             | 562883      | BD biosciences         | 5 µl/test      |
| PE-Cy <sup>TM</sup> 7 Rat Anti-CD11b                                    | 552850      | BD biosciences         | 5 µl/test      |
| Alexa Fluor® 700 Mouse Anti-Human CD56                                  | 557919      | BD biosciences         | 5 µl/test      |
| Alexa Fluor® 647 AffiniPure Mouse Anti-Human IgG, Fcγ fragment specific | 209-605-098 | Jackson ImmunoResearch | 5 µl/test      |
| PE/Cyanine7 anti-mouse CD335 (NKp46) Antibody                           | 137618      | Biolegend              | 5 µl/test      |
| APC Hamster Anti-Mouse CD3e (RUO)                                       | 553066      | BD biosciences         | 5 µl/test      |
| APC Rat Anti-Mouse CD45 (RUO)                                           | 559864      | BD biosciences         | 5 µl/test      |
| PE-Cy <sup>TM</sup> 7 Rat Anti-CD11b                                    | 552850      | BD biosciences         | 5 µl/test      |
| F4/80 Monoclonal Antibody (BM8), PE, eBioscience                        | 12-4801-82  | Thermo Fisher          | 5 µl/test      |
| BV786 Hamster Anti-Mouse CD69 (RUO)                                     | 564683      | BD biosciences         | 5 µl/test      |
| BV510 Mouse Anti-Human Granzyme B (RUO)                                 | 563388      | BD biosciences         | 5 µl/test      |
| Anti-human IgG heavy chain                                              | MAB1307     | sigma                  | 1:500          |
| Anti-HSV                                                                | 361A-15-ASR | Cell marque            | 1:100          |
| Anti-human Fc                                                           | 109-005-098 | Jackson ImmunoResearch | 1:100          |
| Anti-CD11b                                                              | ab133357    | abcam                  | 1:100          |
| Anti-NKp46                                                              | AF2225      | R&D System             | 1:100          |

**Supplementary Table 2. Primers used in this study**

| Name       | Sequence                 |
|------------|--------------------------|
| mIl6 F     | CTGCAAGAGACTTCCATCCAG    |
| mIl6 R     | AGTGGTATAGACAGGTCTGTTGG  |
| mArg1 F    | CTCCAAGCCAAAGTCCTTAGAG   |
| mArg1 R    | GGAGCTGTCATTAGGGACATCA   |
| mCcl2 F    | ATCCACGGCATACTATCAACATC  |
| mCcl2 R    | TCGTAGTCATACGGTGTGGTG    |
| mCcl4 F    | CCAGCTCTGTGCAAACCTAACC   |
| mCcl4 R    | GCCACGAGCAAGAGGAGAGA     |
| mNos2 f    | TGACGGCAAACATGACTTCAG    |
| mNos2 R    | GGTGCCATCGGGCATCT        |
| mIl10 F    | CAGTACAGCCGGGAA GACAATAA |
| mIl10 R    | CCGCAGCTCTAGGAGCATGT     |
| mIl12b F   | CCTGAAGTGTGAAGCACCAAATT  |
| mIl12b R   | CTTCAAGTCCATGTTTCTTTGCA  |
| mIl1b F    | GAAATGCCACCTTTTGACAGTG   |
| mIl1b R    | TGGATGCTCTCATCAGGACAG    |
| hIL1B F    | TTCGACACATGGGATAACGAGG   |
| hIL1B R    | TTTTTGCTGTGAGTCCCGGAG    |
| hIL6 F     | CCTGAACCTTCCAAAGATGGC    |
| hIL6 R     | TTCACCAGGCAAGTCTCCTCA    |
| hIL12A F   | ATGGCCCTGTGCCTTAGTAGT    |
| hIL12A R   | AGCTTTGCATTCATGGTCTTGA   |
| hNOS2 F    | AGGGACAAGCCTACCCCTC      |
| hNOS2 R    | CTCATCTCCCGTCAGTTGGT     |
| hIL10 F    | GACTTTAAGGGTTACCTGGGTTG  |
| hIL10 R    | TCACATGCGCCTTGATGTCTG    |
| 18s rRNA F | GTAACCCGTTGAACCCATT      |
| 18s rRNA R | CCATCCAATCGGTAGTAGCG     |
